# Supplementary material for: Methanol to olefins over H-RUB-13 zeolite: regulation of framework aluminum siting and acid density and their relationship to the catalytic performance
Source: Royal Society of Chemistry journal article supplement (doi:10.1039/c9cy02419k), 2020-01-01
Supplement: c9cy02419k1.pdf [file c9cy02419k1.pdf]

Electronic supplementary information (ESI)

**Methanol to olefins over H-RUB-13 zeolite: Regulation of framework aluminum sitting and acid density and their relation to the catalytic performance**

Li Zhang,<sup>a,b</sup> Sen Wang,<sup>a</sup> Dezhi Shi,<sup>a,b</sup> Zhangfeng Qin,<sup>\*,a</sup> Pengfei Wang,<sup>a</sup> Guofu Wang,<sup>a</sup> Junfen Li,<sup>\*,a</sup> Mei Dong,<sup>a</sup> Weibin Fan,<sup>a</sup> and Jianguo Wang<sup>\*,a,b</sup>

<sup>a</sup> *State Key Laboratory of Coal Conversion, Institute of Coal Chemistry, Chinese Academy of Sciences, P.O. Box 165, Taiyuan, Shanxi 030001, PR China*

<sup>b</sup> *University of the Chinese Academy of Sciences, Beijing 100049, PR China*

*\* Corresponding authors. Tel.: +86-351-4046092; Fax: +86-351-4041153. E-mail address: qzhf@sxicc.ac.cn (Z. Qin); lijunfen@sxicc.ac.cn (J. Li); iccjgw@sxicc.ac.cn (J. Wang)*

As the Electronic supplementary information (ESI) of the manuscript “*Methanol to olefins over H-RUB-13 zeolite: Regulation of framework aluminum sitting and acid density and their relation to the catalytic performance*”, following materials are provided:

XRD patterns, SEM images, Py-IR spectra and FT-IR spectra of the H-Al-B-RUB-13 zeolites; deconvolution of the <sup>27</sup>Al MAS NMR spectra; catalytic performance of the aluminum-free H-B-RUB-13 zeolite in MTO; detailed reaction results for MTO over the H-Al-B-RUB-13 zeolites.

**Table S1.** Calculated absolute chemical shielding tensors ( $\delta_{\text{abs}}$ ) and relative chemical shifts ( $\delta_{\text{rel}}$ ) for the MAS NMR of  $^{27}\text{Al}$  located at different T sites in the framework of H-RUB-13 zeolites

| T site | $\delta_{\text{abs}}$ (ppm) | $\delta_{\text{rel}}$ (ppm) <sup>a</sup> |
|--------|-----------------------------|------------------------------------------|
| T1     | 530.1                       | 56.8                                     |
| T2     | 531.2                       | 55.7                                     |
| T3     | 529.1                       | 57.8                                     |
| T4     | 528.5                       | 58.4                                     |

**Note:** The relative chemical shift of  $^{27}\text{Al}$  MAS NMR is the difference between the calculated chemical shift of  $\text{Al}(\text{H}_2\text{O})_6^{3+}$  (586.9 ppm) and the absolute chemical shielding tensors of different T sites, that is,  $\delta_{\text{rel}} = 586.9 - \delta_{\text{abs}}$ .

**Table S2.**  $^{27}\text{Al}$  chemical shifts in the isotropic protection ( $\delta_{\text{F1}}$ , ppm) and in the observed dimension ( $\delta_{\text{F2}}$ , ppm) as well as the isotropic chemical shifts ( $\delta_{\text{iso}}$ , ppm) and the second-order quadrupolar effect parameter ( $S_{\text{Q}}$ , MHz) for the H-Al-B-RUB-13-170- $n$  series zeolites (Si/Al  $\approx$  170) with different Si/B ( $n$ ) ratios

| Si/B = 47            |                      |                       |                | Si/B = 85            |                      |                       |                | Si/B = 155           |                      |                       |                | Si/B = 239           |                      |                       |                |
|----------------------|----------------------|-----------------------|----------------|----------------------|----------------------|-----------------------|----------------|----------------------|----------------------|-----------------------|----------------|----------------------|----------------------|-----------------------|----------------|
| $\delta_{\text{F1}}$ | $\delta_{\text{F2}}$ | $\delta_{\text{iso}}$ | $S_{\text{Q}}$ |
| 57.5                 | 56.5                 | 57.1                  | 6.6            | 57.5                 | 56.5                 | 57.1                  | 6.6            | 57.5                 | 56.5                 | 57.1                  | 6.6            | 57.0                 | 56.0                 | 56.6                  | 6.5            |
| 59.0                 | 58.0                 | 58.6                  | 6.6            | 59.0                 | 58.0                 | 58.6                  | 6.6            | 59.5                 | 58.2                 | 59.0                  | 6.7            | 59.0                 | 57.5                 | 58.4                  | 6.6            |
| 62.0                 | 60.5                 | 61.4                  | 6.8            | 61.5                 | 60.5                 | 61.1                  | 6.8            | 61.5                 | 60.5                 | 61.1                  | 6.9            | 61.5                 | 60.0                 | 61.0                  | 6.8            |

**Note:** The second-order quadrupolar effect parameter ( $S_{\text{Q}}$ ) and isotropic chemical shifts ( $\delta_{\text{iso}}$ ) are obtained by:  $S_{\text{Q}}^2 = \delta_{\text{iso}} - \delta_{\text{F2}} \times k$ ,  $\delta_{\text{iso}} = (17\delta_{\text{F1}} + 10\delta_{\text{F2}}) / 27$ , and  $k = [4I \times (I + 1) - 3] / [4I \times (2I - 1) \times \nu_0]^2 \times 3 \times 105$ , where  $I$  (5/2) is the spin quantum number of  $^{27}\text{Al}$  and  $\nu_0$  is Larmor frequency.

**Table S3.** Chemical composition and catalytic performance of the aluminum-free H-B-RUB-13 zeolite in MTO

| Item                                                                  | Value               |
|-----------------------------------------------------------------------|---------------------|
| Si/B molar ratio measured by ICP-OES                                  | 15                  |
| Acidity determined by NH <sub>3</sub> -TPD ( $\mu\text{mol g}^{-1}$ ) | 10.0                |
| Methanol conversion at 27 min on stream (%)                           | 3.8                 |
| Selectivity to CH <sub>4</sub> ; C <sub>2-4</sub> =; and others (%)   | 22.5; 72.6; and 4.9 |
| Methanol conversion at 159 min on stream (%)                          | 1.3                 |
| Selectivity to CH <sub>4</sub> ; C <sub>2-4</sub> =; and others (%)   | 26.8; 68.2; and 5.0 |

**Note:** Reaction was carried out at 450 °C and atmospheric pressure, with a methanol WHSV of 1.0 h<sup>-1</sup> and a carrier gas (N<sub>2</sub>) flow of 54 mL min<sup>-1</sup>. C<sub>2-4</sub>= represents olefins from ethene to butenes.

**Table S4.** Reaction results of MTO over the H-Al-B-RUB-13-*m-n* zeolites with different Si/Al (*m*) and Si/B (*n*) ratios

| H-Al-B-RUB-13- <i>m-n</i> | Conv. (%) | Product selectivity (%) |              |              |              |              |           |          |                  | $C_{2-5}^{\neq}/C_{2-5}$ |
|---------------------------|-----------|-------------------------|--------------|--------------|--------------|--------------|-----------|----------|------------------|--------------------------|
|                           |           | $C_1$                   | $C_2^{\neq}$ | $C_3^{\neq}$ | $C_4^{\neq}$ | $C_5^{\neq}$ | $C_{2-5}$ | $C_{6+}$ | $C_{2-5}^{\neq}$ |                          |
| H-Al-B-RUB-13-170-47      | 98.9      | 0.4                     | 19.7         | 48.6         | 22.2         | 5.7          | 2.2       | 0.8      | 96.2             | 43.7                     |
| H-Al-B-RUB-13-170-85      | 98.4      | 0.5                     | 19.1         | 47.9         | 22.6         | 6.1          | 2.6       | 1.0      | 95.7             | 36.8                     |
| H-Al-B-RUB-13-170-155     | 98.5      | 0.4                     | 19.9         | 47.9         | 22.6         | 5.4          | 2.3       | 1.0      | 95.8             | 41.6                     |
| H-Al-B-RUB-13-170-239     | 98.4      | 0.4                     | 19.5         | 47.1         | 22.4         | 5.8          | 3.4       | 1.1      | 94.8             | 27.9                     |
| H-Al-B-RUB-13-59-17       | 100       | 0.7                     | 14.2         | 32.6         | 28.2         | 10.0         | 8.4       | 5.9      | 85.0             | 10.1                     |
| H-Al-B-RUB-13-76-17       | 100       | 0.6                     | 16.6         | 39.5         | 23.9         | 8.8          | 9.1       | 5.8      | 88.8             | 9.6                      |
| H-Al-B-RUB-13-169-17      | 97.1      | 0.7                     | 19.4         | 49.1         | 21.7         | 5.3          | 2.6       | 0.9      | 95.7             | 36.8                     |
| H-Al-B-RUB-13-276-17      | 90.1      | 0.6                     | 19.6         | 47.1         | 24.1         | 6.2          | 1.7       | 0.7      | 97.0             | 57.1                     |

**Note:** The MTO reactions were carried out at 400 °C and atmospheric pressure, with a methanol WHSV of 1.0 h<sup>-1</sup>; the data were reported at 90 min on stream.

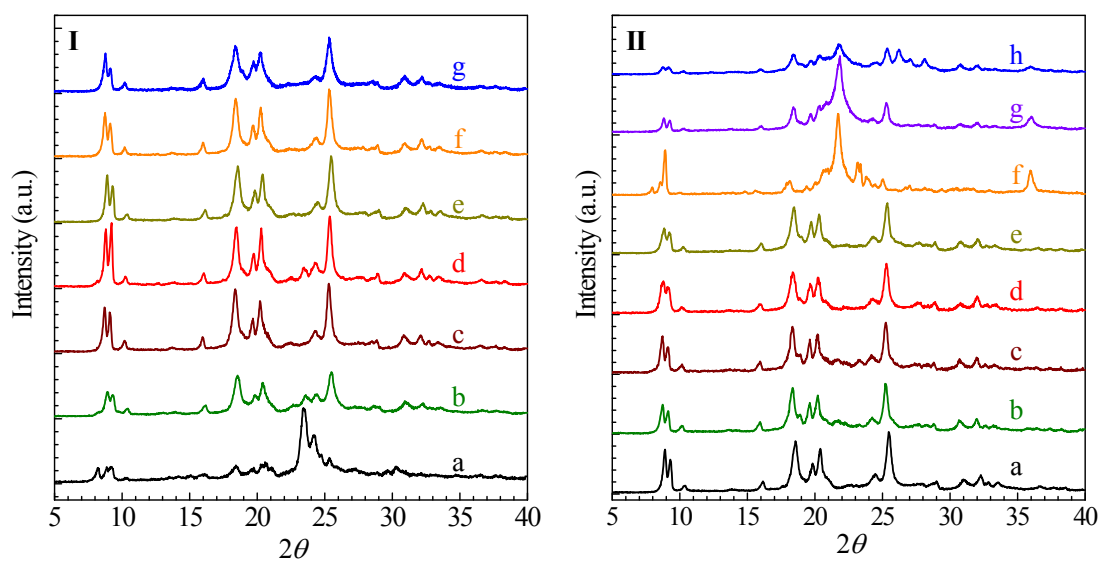

**Fig. S1.** XRD patterns of the as-synthesized Al-B-RUB-13 zeolites. **(I)** Prepared with Si/B = 1 and different Si/Al ratios in the synthesis gel: (a) Si/Al = 30; (b) Si/Al = 50; (c) Si/Al = 70; (d) Si/Al = 100; (e) Si/Al = 200; (f) Si/Al = 300; (g) Si/Al =  $\infty$ . **(II)** Prepared with Si/Al = 200 and different Si/B ratios in the synthesis gel: (a) Si/B = 1; (b) Si/B = 30; (c) Si/B = 70; (d) Si/B = 100; (e) Si/B = 200; (f) Si/B = 250; (g) Si/B = 300; (h) Si/B =  $\infty$ .

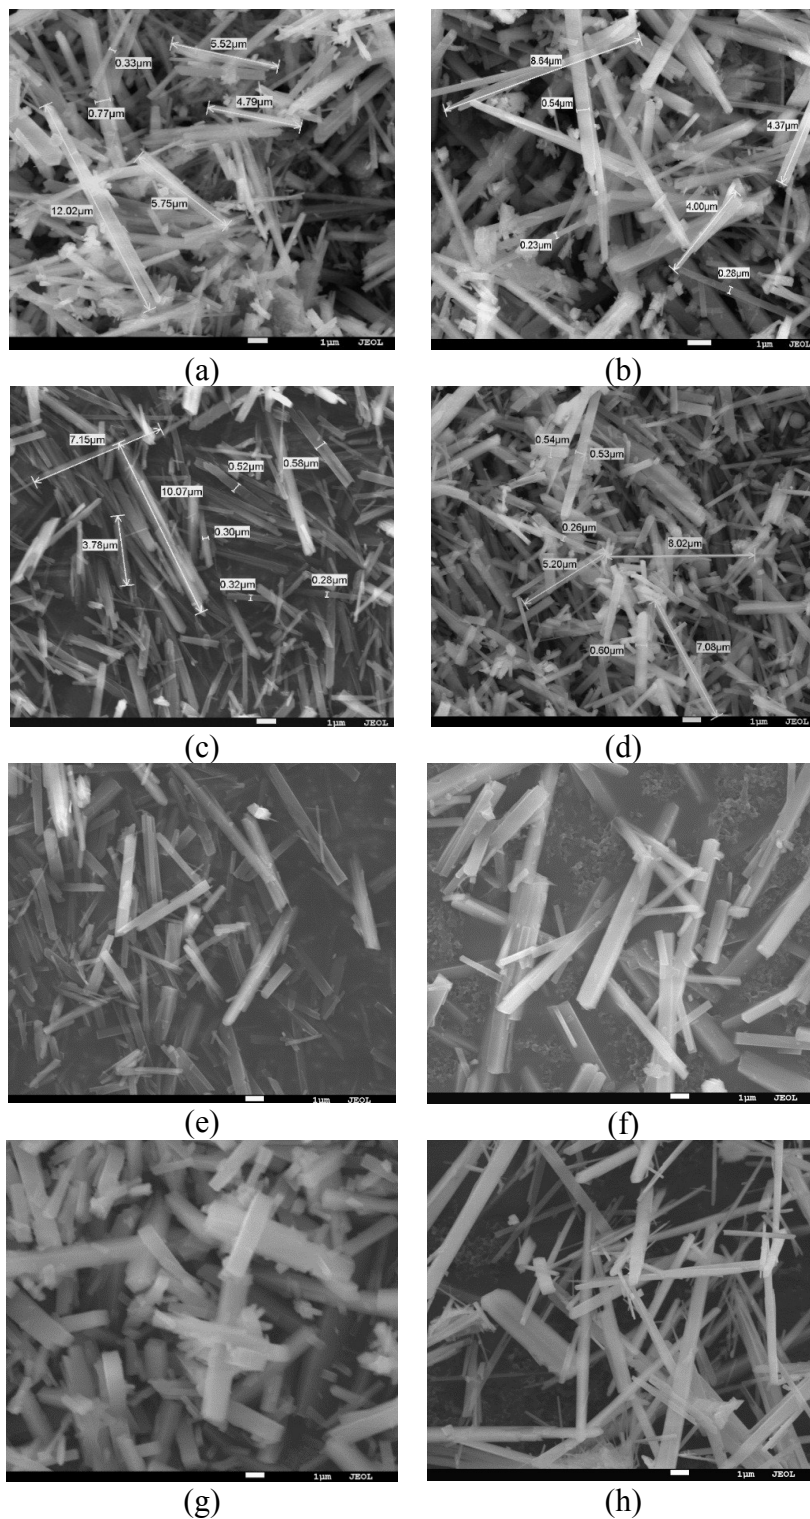

**Fig. S2.** SEM images of the as-synthesized Al-B-RUB-13 zeolites prepared with Si/Al = 200 and different Si/B ratios in the synthesis gel: (a) Si/B = 30; (b) Si/B = 70; (c) Si/B = 100; (d) Si/B = 200 and those prepared with Si/B = 1 and different Si/Al ratios in the synthesis gel: (e) Si/Al = 70; (f) Si/Al = 100; (g) Si/Al = 200; (h) Si/Al = 300.

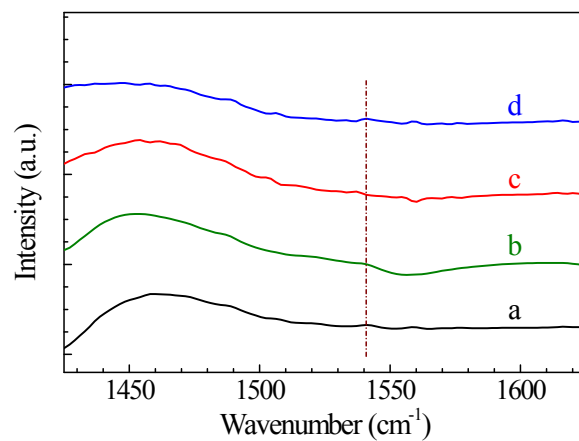

**Fig. S3.** Py-IR spectra collected at 150 °C for the H-Al-B-RUB-13-170-*n* series zeolites with Si/Al  $\approx$  170 and different Si/B (*n*) ratios: (a) Si/B = 47; (b) Si/B = 85; (c) Si/B = 155; (d) Si/B = 239.

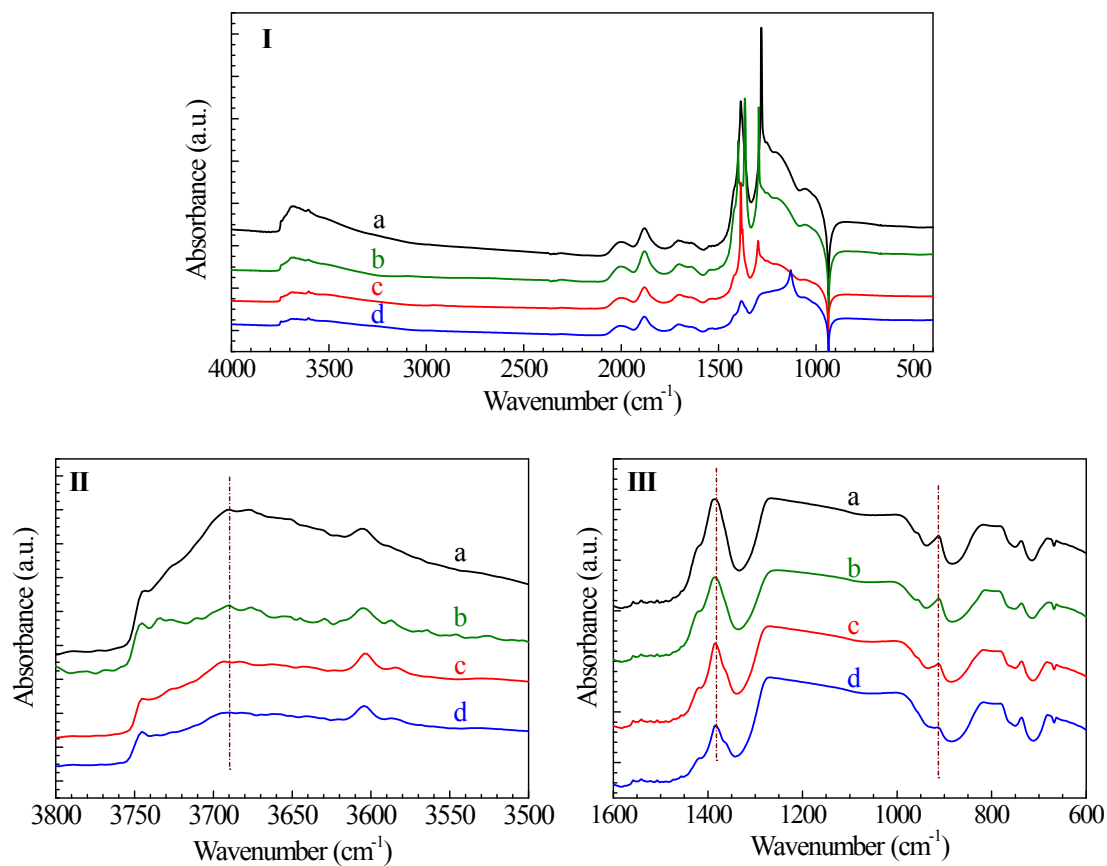

**Fig. S4.** FT-IR spectra in full range (**I**), in the OH stretching vibration range (**II**), and in the framework region (**III**) collected for the H-Al-B-RUB-13-170-*n* series zeolites with Si/Al  $\approx$  170 and different Si/B (*n*) ratios: (a) Si/B = 47; (b) Si/B = 85; (c) Si/B = 155; (d) Si/B = 239.



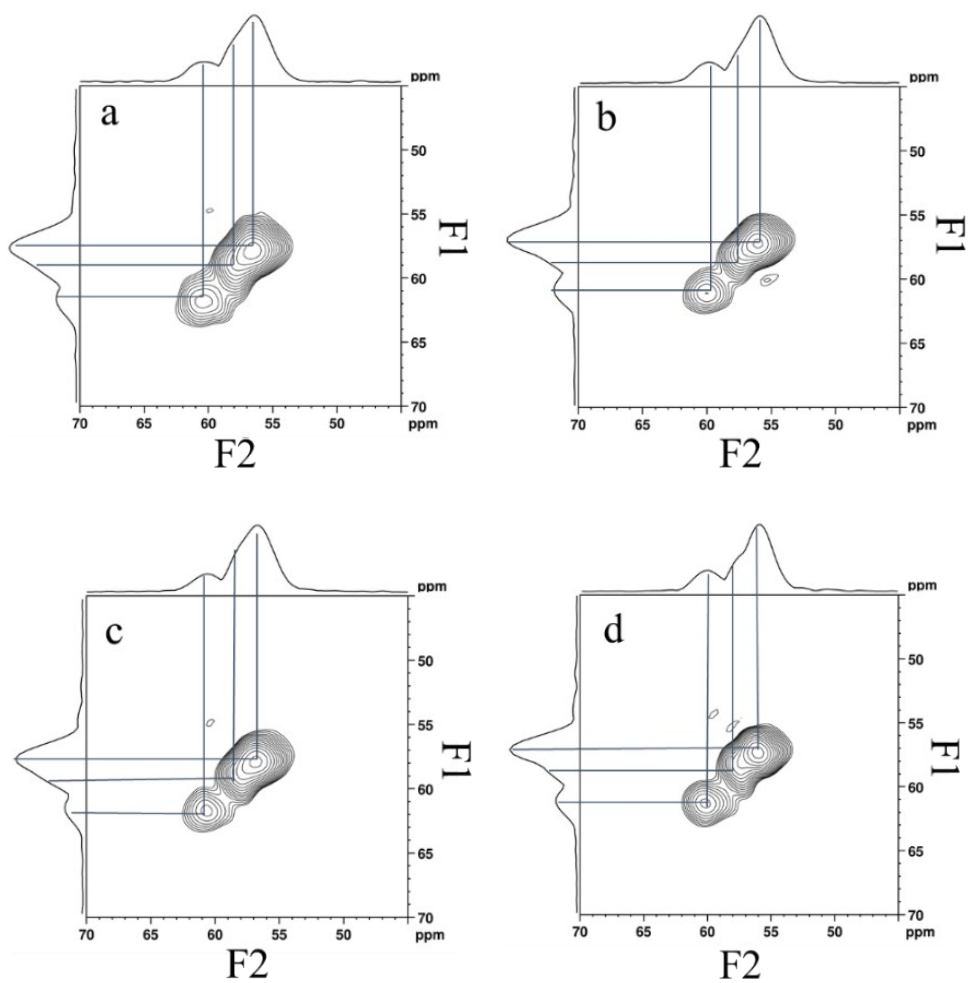

**Fig. S5.** 2D  $^{27}\text{Al}$  MQ/MAS NMR spectra of the H-Al-B-RUB-13-170- $n$  series zeolites with  $\text{Si}/\text{Al} \approx 170$  and different  $\text{Si}/\text{B}$  ( $n$ ) ratios: (a)  $\text{Si}/\text{B} = 47$ ; (b)  $\text{Si}/\text{B} = 85$ ; (c)  $\text{Si}/\text{B} = 155$ ; (d)  $\text{Si}/\text{B} = 239$ .

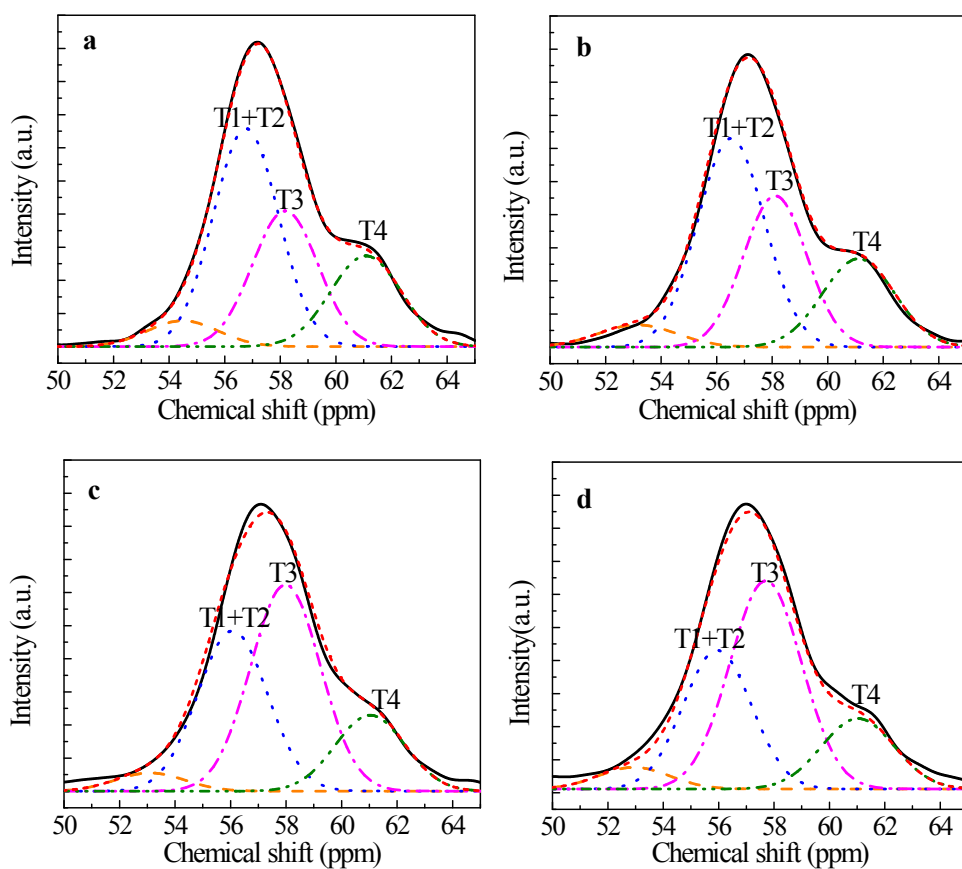

**Fig. S6.** Deconvolution of the  $^{27}\text{Al}$  MAS NMR spectra of the H-Al-B-RUB-13-170- $n$  series zeolites with  $\text{Si}/\text{Al} \approx 170$  and different  $\text{Si}/\text{B}$  ( $n$ ) ratios: (a)  $\text{Si}/\text{B} = 47$ ; (b)  $\text{Si}/\text{B} = 85$ ; (c)  $\text{Si}/\text{B} = 155$ ; (d)  $\text{Si}/\text{B} = 239$ . The black and red lines represent the measured and fitted curves, respectively.

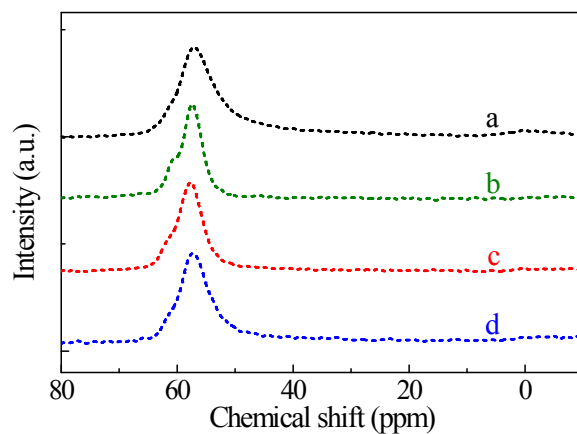

**Fig. S7.**  $^{27}\text{Al}$  MAS NMR spectra of the H-Al-B-RUB-13-*m*-17 series zeolites with  $\text{Si/B} \approx 17$  and different Si/Al (*m*) ratios: (a) Si/Al = 59; (b) Si/Al = 76; (c) Si/Al = 169; (d) Si/Al = 276.

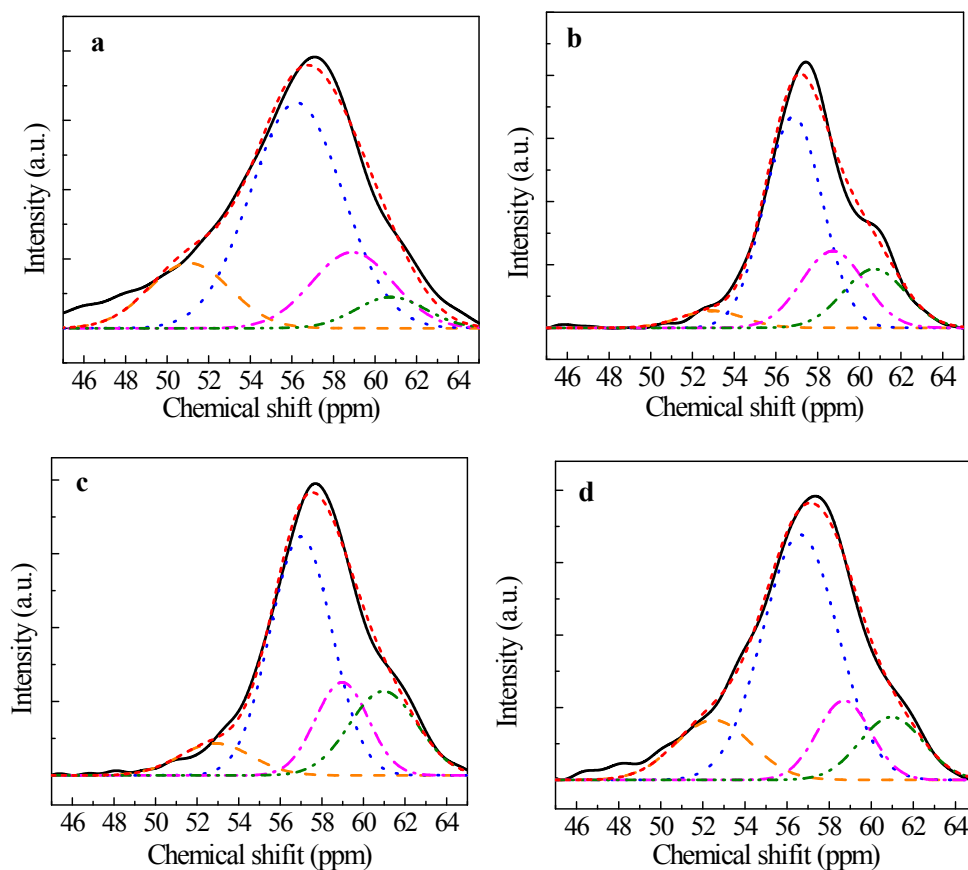

**Fig. S8.** Deconvolution of the  $^{27}\text{Al}$  MAS NMR spectra of the H-Al-B-RUB-13- $m$ -17 seires zeolites with  $\text{Si/B} \approx 17$  and different  $\text{Si/Al}$  ( $m$ ) ratios: (a)  $\text{Si/Al} = 59$ ; (b)  $\text{Si/Al} = 76$ ; (c)  $\text{Si/Al} = 169$ ; (d)  $\text{Si/Al} = 276$ . The black and red lines represent the measured and fitted curves, respectively.

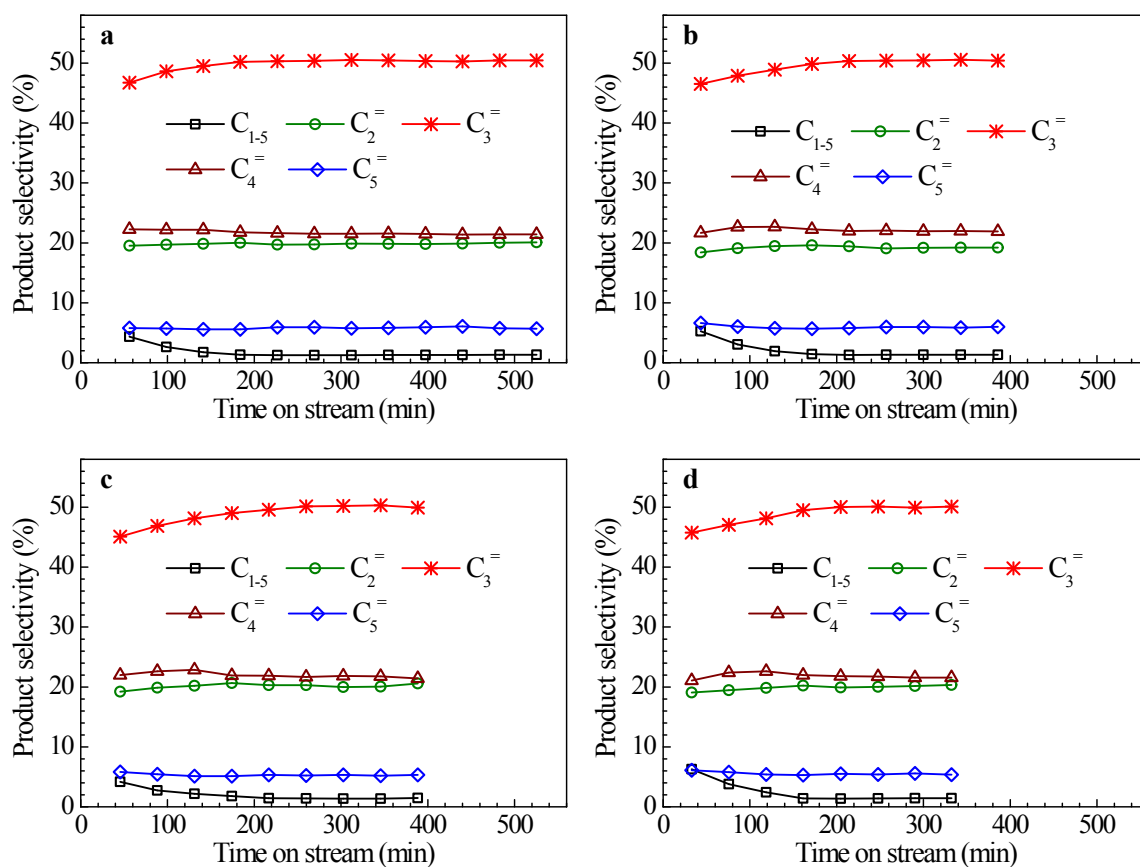

**Fig. S9.** Products distribution profiles for MTO over H-Al-B-RUB-13-170-*n* series zeolites with Si/Al  $\approx$  170 and different Si/B (*n*) ratios: (a) Si/B = 47; (b) Si/B = 85; (c) Si/B = 155; (d) Si/B = 239. The reactions were carried out in a fixed-bed reactor at 400 °C and atmospheric pressure, with a methanol WHSV of 1.0 h<sup>-1</sup>.

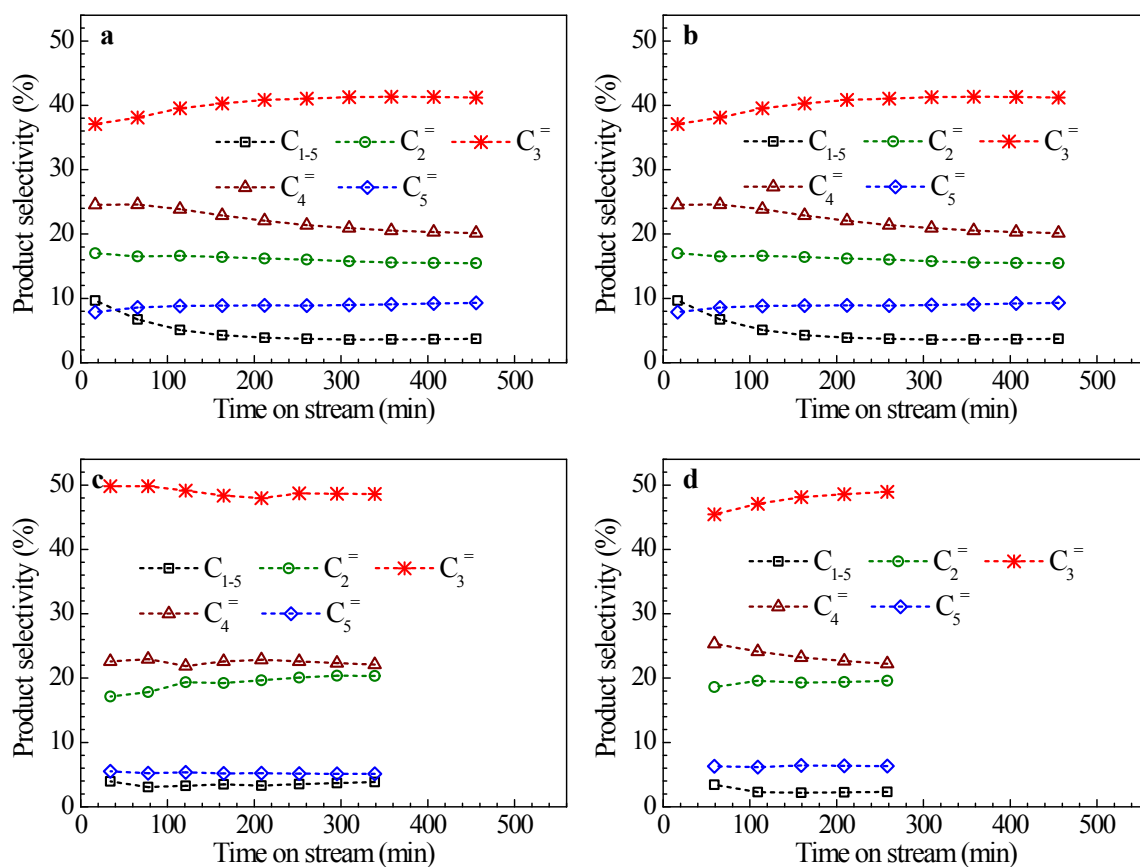

**Fig. S10.** Products distribution profiles for MTO over H-Al-B-RUB-13-*m*-17 series zeolites with Si/B  $\approx$  17 and different Si/Al (*m*) ratios: (a) Si/Al = 59; (b) Si/Al = 76; (c) Si/Al = 169; (d) Si/Al = 276. The reactions were carried out in a fixed-bed reactor at 400 °C and atmospheric pressure, with a methanol WHSV of 1.0 h<sup>-1</sup>.

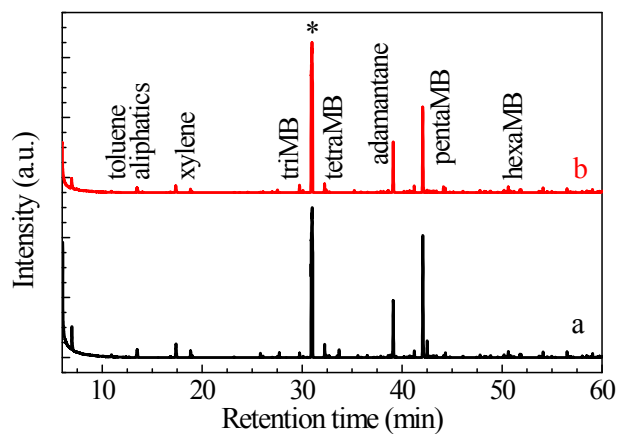

**Fig. S11.** GC-MS chromatograms of the organic species retained in H-Al-B-RUB-13-170-47 (a) and H-Al-B-RUB-13-170-85 after the  $^{12}\text{C}/^{13}\text{C}$ -methanol switch experiment at 300 °C. The symbol “\*” represents the internal standard (hexachloroethane).
